# Supplementary material for: The acquisition of humoral immune responses targeting Plasmodium falciparum sexual stages in controlled human malaria infections
Source: Frontiers journal article supplement (doi:10.3389/fimmu.2022.930956), 2022-07-18
Supplement: Table_1.xlsx [file Table_1.xlsx]

## Sheet: Sheet1
	Timepoint	C-1				C+21				C+35/36								C+51
	Cohort	SPZ Gct	BS Gct	SPZ control	BS control	SPZ Gct		BS Gct		SPZ Gct		BS Gct		SPZ control		BS control		SPZ Gct		BS Gct
		Mean (95% CI)				Mean (95% CI)	p	Mean (95% CI)	p	Mean (95% CI)	p	Mean (95% CI)	p	Mean (95% CI)	p	Mean (95% CI)	p	Mean (95% CI)	p	Mean (95% CI)	p
	csp	765.83 (368.87-1162.79)	1550.17 (-589.29-3689.63)	383.7 (10.13-757.27)	257 (114.83-399.17)	6959.54 (4350.98-9568.11)	0.001	2287.02 (-940.16-5514.2)	0.223	7875.54 (4070.69-11680.39)	0.004	1558.19 (106.96-3009.42)	0.984	4119.1 (148.42-8089.78)	0.147	973.5 (-52.7-1999.7)	0.243	7876.67 (3784.84-11968.49)	0.007	4713.02 (374.47-9051.57)	0.039
	eba140riiiv	931 (246.13-1615.87)	454.21 (179.66-728.76)	397.1 (213.66-580.54)	203.9 (86.79-321.01)	1900.9 (522.13-3279.66)	0.038	641.67 (366.13-917.2)	0.138	1675.02 (604.58-2745.46)	0.019	500.67 (283.85-717.48)	0.573	708.7 (250.37-1167.03)	0.221	281.6 (157.72-405.48)	0.011	1680.27 (514.36-2846.19)	0.021	1126.12 (587.96-1664.29)	0.001
	eba175riiiv	234.08 (93.01-375.16)	252.54 (105.33-399.75)	182.5 (84.98-280.02)	104.3 (40-168.6)	259.29 (167.11-351.47)	0.651	664.79 (-23.29-1352.88)	0.247	300 (168.47-431.53)	0.149	826.71 (-449.04-2102.45)	0.395	366.1 (-44.79-776.99)	0.444	128.5 (65.01-191.99)	0.201	315.04 (178.29-451.79)	0.067	1529.04 (-568.63-3626.72)	0.255
	eba181riiiv	378.58 (259.56-497.61)	273.33 (128.53-418.13)	258.3 (89.67-426.93)	154.2 (78.1-230.3)	485.23 (166.36-804.1)	0.494	303.25 (129.45-477.05)	0.572	437.15 (266.23-608.06)	0.434	198.5 (122.19-274.81)	0.145	239.1 (154.41-323.79)	0.682	185 (95.42-274.58)	0.133	439.85 (303.7-576.01)	0.224	506.75 (257.59-755.91)	0.008
	etramp5ag1	849.92 (106.77-1593.06)	374.75 (190.31-559.19)	257.3 (133.36-381.24)	1522.1 (-706.59-3750.79)	8232.98 (4125.66-12340.3)	0.005	7117.94 (1908.01-12327.86)	0.027	12279.85 (6784.9-17774.81)	0.002	8218.81 (3013.52-13424.11)	0.013	4420.9 (-1124.71-9966.51)	0.212	3211.4 (-1636.29-8059.09)	0.277	12073.23 (6680.92-17465.54)	0.002	10146.23 (5209.95-15082.51)	0.002
	glurpr2	296.46 (178.55-414.36)	149.75 (95.36-204.14)	607 (69.37-1144.63)	226.7 (30.99-422.41)	10810.56 (4419.75-17201.38)	0.007	2235.19 (183.4-4286.97)	0.073	10488.69 (6374.63-14602.74)	<0.001	1985.77 (733.63-3237.91)	0.016	12688.2 (369.45-25006.95)	0.12	3054.7 (-67.57-6176.97)	0.156	8127.44 (4852.63-11402.25)	0.001	3100.98 (1601.64-4600.32)	0.003
	hsp40ag1	1456.96 (782.89-2131.03)	995.54 (448.81-1542.27)	1073.1 (609.51-1536.69)	992.1 (410.72-1573.48)	1301.69 (780.26-1823.12)	0.324	1052.38 (531.36-1573.39)	0.756	1314.52 (813.74-1815.31)	0.487	725.25 (430.61-1019.89)	0.125	922.3 (521.48-1323.12)	0.049	1071.9 (478.18-1665.62)	0.467	1448.65 (888.84-2008.45)	0.948	1599.29 (912.98-2285.6)	0.004
	msp2ch150	428.04 (173.78-682.31)	335.67 (171.05-500.28)	285.35 (151.65-419.05)	319.55 (71.72-567.38)	365.44 (218.26-512.62)	0.38	391.67 (166.12-617.22)	0.45	411.06 (219.97-602.15)	0.794	240.67 (152.39-328.94)	0.082	244.25 (135-353.5)	0.086	340.45 (87.91-592.99)	0.351	459.81 (232.41-687.22)	0.51	605.75 (317.78-893.72)	0.009
	msp2dd2	405.17 (124.11-686.22)	282.62 (74.26-490.99)	684.4 (-154.72-1523.52)	359.4 (109.11-609.69)	1488.52 (91.46-2885.58)	0.093	463.12 (177.72-748.53)	0.048	1484.73 (551.51-2417.95)	0.028	297.54 (173.26-421.82)	0.837	581.9 (-51.25-1215.05)	0.398	425.6 (231.41-619.79)	0.254	1324.56 (585.49-2063.64)	0.022	682.54 (339.89-1025.19)	0.001
	pfama1	307.83 (213.3-402.37)	177.38 (95.77-258.98)	262.2 (64.15-460.25)	423.7 (123.97-723.43)	395.73 (300.78-490.68)	0.067	261.71 (137.37-386.05)	0.096	554.27 (299.94-808.6)	0.078	171.54 (111.49-231.59)	0.863	768.6 (-196.44-1733.64)	0.351	499.8 (243.41-756.19)	0.299	516.4 (351.58-681.22)	0.021	410.58 (249.24-571.93)	0.002
	pfmsp119	1090.88 (589.08-1592.67)	805.83 (392.65-1219.02)	852.6 (458.21-1246.99)	745.2 (305.42-1184.98)	5855.71 (3063.22-8648.19)	0.005	5886.21 (1935.18-9837.24)	0.031	20303.5 (16846.58-23760.42)	<0.001	11159 (8096.09-14221.91)	<0.001	10503.4 (2833.98-18172.82)	0.064	15884.1 (8282.16-23486.04)	0.018	22292.58 (19197.37-25387.8)	<0.001	17875.29 (14400.7-21349.88)	<0.001
	pfs230cmb	985.58 (529.2-1441.97)	701.5 (257.97-1145.03)	844.85 (461.23-1228.47)	701.65 (342.93-1060.37)	919.67 (494.2-1345.14)	0.352	716.85 (359.24-1074.47)	0.909	927.08 (540.62-1313.55)	0.367	498.48 (257.72-739.23)	0.143	763.85 (420.44-1107.26)	0.055	735.05 (394.13-1075.97)	0.645	1019.79 (586.96-1452.63)	0.335	1057.19 (595.27-1519.1)	0.008
	pfs484510c	2101.21 (1014.79-3187.63)	994.96 (407.45-1582.47)	3120.2 (-267.26-6507.66)	970.3 (485.54-1455.06)	2092.69 (1016.48-3168.9)	0.938	1106.94 (537.43-1676.45)	0.572	2190.48 (940.1-3440.85)	0.526	814.19 (508.52-1119.86)	0.44	3908.9 (-1390.28-9208.08)	0.47	1109.8 (729.02-1490.58)	0.257	2671.81 (1285.29-4058.34)	0.101	3356.85 (2136.54-4577.17)	<0.001
	pfs484510n	1149.42 (791.24-1507.59)	761.21 (358.55-1163.87)	843.3 (376.2-1310.4)	631 (353.36-908.64)	1119.92 (755.84-1484)	0.693	771.38 (453.65-1089.1)	0.924	1055.62 (753.96-1357.29)	0.144	644.29 (427.17-861.41)	0.401	650.3 (363.58-937.02)	0.194	704.8 (378.79-1030.81)	0.393	1364.71 (916.27-1813.14)	0.156	2833.79 (1452.58-4215)	0.01
	pfs48456c	2353.17 (771.86-3934.48)	983.88 (392.98-1574.77)	3559.2 (-697.2-7815.6)	837.4 (406.35-1268.45)	2280.33 (767.79-3792.87)	0.542	1108.54 (500.13-1716.95)	0.55	2364.58 (591.4-4137.77)	0.942	697.88 (418.18-977.57)	0.142	5054 (-2529.14-12637.14)	0.431	987.2 (641.5-1332.9)	0.242	2673.08 (837.08-4509.09)	0.147	2281.88 (1061.05-3502.7)	0.008
	pfs4845fulllength	1256.46 (814.36-1698.56)	793.62 (353.84-1233.41)	1099.4 (630.12-1568.68)	941.3 (482.66-1399.94)	1260.25 (759.75-1760.75)	0.965	826.58 (484.3-1168.87)	0.796	1175.88 (796.29-1555.46)	0.212	551.79 (342.19-761.39)	0.139	920.7 (571.93-1269.47)	0.079	1065.3 (509.85-1620.75)	0.257	1618.21 (871.82-2364.6)	0.188	1739.46 (993.38-2485.53)	0.002
	pfsea	400.75 (168.2-633.3)	370.5 (158.16-582.84)	397.6 (80.91-714.29)	161.1 (41.24-280.96)	586.6 (242.87-930.33)	0.387	472.35 (151.39-793.32)	0.331	530.02 (338.21-721.83)	0.157	274.44 (145.63-403.24)	0.144	590.7 (58.6-1122.8)	0.222	307.7 (82.46-532.94)	0.248	508.15 (305.4-710.9)	0.128	671.4 (312.03-1030.76)	0.008
	rh22030	752.67 (345.88-1159.45)	484.79 (255.41-714.17)	324.55 (167.76-481.34)	256.05 (144.02-368.08)	928.96 (611.42-1246.5)	0.325	723.98 (184.48-1263.48)	0.251	972.25 (598.36-1346.14)	0.097	459.52 (216.75-702.29)	0.765	497.75 (61.13-934.37)	0.434	374.65 (193.64-555.66)	0.123	918.67 (574.99-1262.35)	0.119	1109.81 (457.57-1762.05)	0.028
	rh42	1275.79 (819.22-1732.36)	803.5 (403.35-1203.65)	4512.4 (-1653.87-10678.67)	949 (683.13-1214.87)	2544.98 (1344.93-3745.03)	0.033	1885.98 (391.58-3380.37)	0.176	3146.6 (1747.75-4545.46)	0.022	1556.02 (586.07-2525.97)	0.173	5638.5 (108.21-11168.79)	0.667	3610 (-809.71-8029.71)	0.302	3412.85 (1776.81-5048.9)	0.025	3151.1 (1521.21-4780.99)	0.015
	rh51	364.79 (262.64-466.94)	224.79 (135.36-314.22)	264.3 (167.12-361.48)	256.3 (157.83-354.77)	343.42 (267.99-418.85)	0.426	251.33 (154.32-348.35)	0.489	353.96 (289.65-418.26)	0.681	172.62 (124.58-220.67)	0.108	290.2 (156.32-424.08)	0.454	270.4 (172.11-368.69)	0.454	406.21 (315.73-496.69)	0.048	381.79 (259.32-504.26)	0.002
	sbp1	951.5 (175.37-1727.63)	638.46 (308.79-968.13)	458.4 (187.01-729.79)	766.1 (240.73-1291.47)	837.58 (242.2-1432.97)	0.275	687.92 (375.9-999.94)	0.535	1125.12 (173.24-2077.01)	0.498	650.42 (192.07-1108.76)	0.928	453.1 (162.95-743.25)	0.945	801.4 (294.59-1308.21)	0.188	1114.38 (250.07-1978.68)	0.234	1270 (553.18-1986.82)	0.017
